# Supplementary material for: Sensitivity of hematopoietic stem cells to mitochondrial dysfunction by SdhD gene deletion
Source: PubMed Central journal article supplement (PMC5261010; doi:10.1038/cddis.2016.411), 2016-12-08
Supplement: cddis2016411x1.pdf [file cddis2016411x1.pdf]

## Supplementary Information

### **Sensitivity of hematopoietic stem cells to mitochondrial dysfunction by *SdhD* gene deletion**

José Antonio Bejarano-García<sup>1</sup>, África Millán-Uclés<sup>1</sup>, Iván V. Rosado<sup>1</sup>, L. Ignacio Sánchez-Abarca<sup>1</sup>, Teresa Caballero-Velázquez<sup>1,2</sup>, María J. Durán-Galván<sup>1</sup>, José A. Pérez-Simón<sup>\*1,2</sup>, and José I. Piruat<sup>\*1,2</sup>

<sup>1</sup> Instituto de Biomedicina de Sevilla (IBiS), Hospital Universitario Virgen del Rocío, CSIC, Universidad de Sevilla, Seville, Spain

<sup>2</sup> Departamento de Hematología. Hospital Universitario Virgen del Rocío. Seville, Spain

**Running title:** Hematopoiesis dependency on mitochondria

\*Corresponding authors:

Dr. José I. Piruat / Dr. José A. Pérez-Simón

Instituto de Biomedicina de Sevilla (IBiS)

Campus Hospital Universitario Virgen del Rocío

Avenida Manuel Siurot s/n

41013 Seville, Spain

Phone +34 955 923088

[jpiruat-ibis@us.es](mailto:jpiruat-ibis@us.es), [josea.perez.simon.sspa@juntadeandalucia.es](mailto:josea.perez.simon.sspa@juntadeandalucia.es)

The Supplementary Information of this manuscript contains three supplementary figures with their legends, and one supplementary table.

## Figure Legends

**Figure supplementary 1.** Analysis of bone marrow CD45<sup>+</sup> cells after 2 (T2) and 5 weeks (T5) after tamoxifen treatment. **(A)** Quantification of CD45<sup>+</sup> leukocytes relative to the total number of events. Each symbol represents data from a single animal. **(B)** Percentage of Annexin V<sup>+</sup> events in CD45<sup>+</sup> population. N=7-17 per genotype. Bars represent the mean values  $\pm$  SEM. Statistical significance: \*:  $P \leq 0.05$ ; \*\*:  $P \leq 0.01$ ; \*\*\*:  $P \leq 0.001$ .

**Figure supplementary 2.** Hematimetric analysis of circulating cells in blood of *SdhD*<sup>flox/+</sup> (+/+), *SdhD*<sup>flox/-</sup> (+/-), and *SdhD*<sup>flox/-</sup> CRE (SDHD-ESR) individuals after tamoxifen treatment. N=8-16 per genotype and group. Plots represent the median values in the interquartile range  $\pm$  standard deviation. Statistical significance: \*\*\*:  $P \leq 0.001$ .

**Figure supplementary 3.** Quantification of T-cells subpopulations in thymi of SDHD-ESR mice according to the expression of CD4 and CD8 markers. Values are relative to the total number of events analyzed by flow cytometry.
