# Supplementary material for: Sensitivity of hematopoietic stem cells to mitochondrial dysfunction by SdhD gene deletion
Source: PubMed Central journal article supplement (PMC5261010; doi:10.1038/cddis.2016.411), 2016-12-08
Supplement: cddis2016411x3.pdf [file cddis2016411x3.pdf]

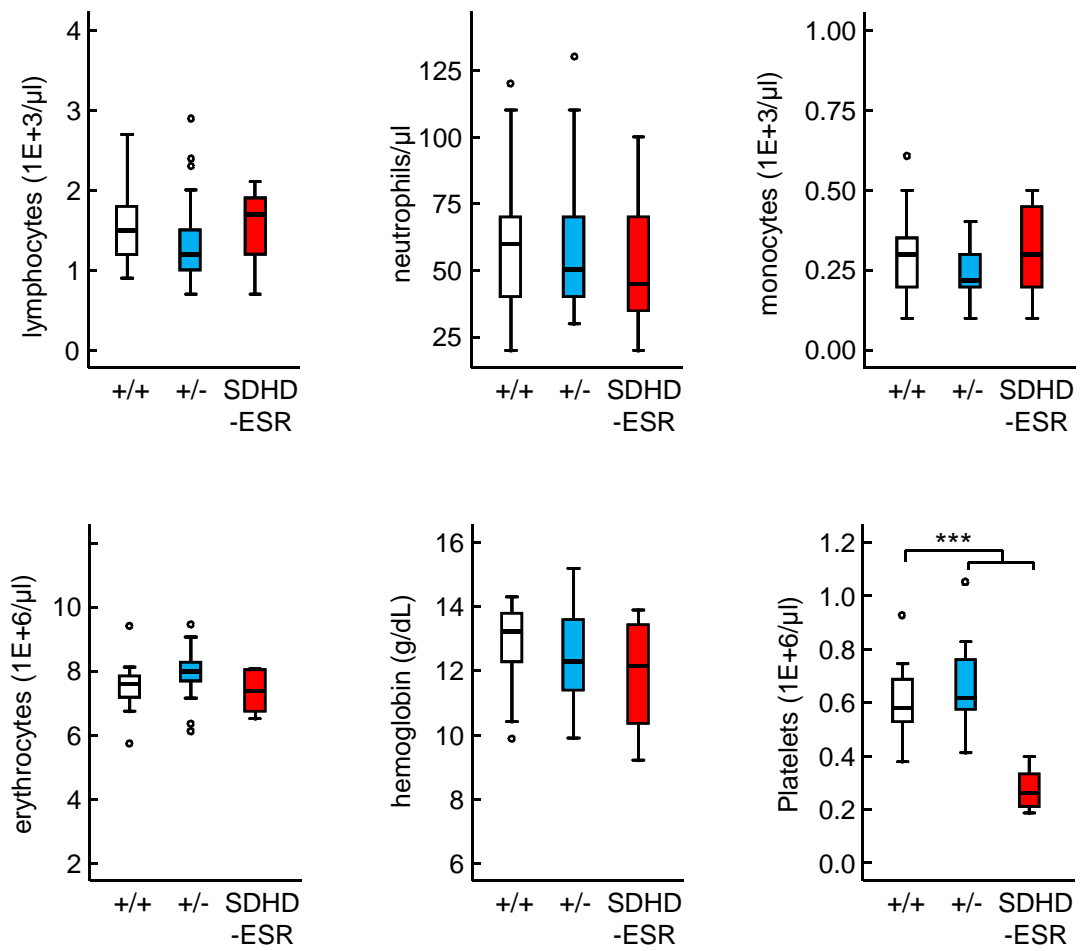

Figure supplementary 2. Bejarano-García *et al.*
