# Supplementary material for: Sensitivity of hematopoietic stem cells to mitochondrial dysfunction by SdhD gene deletion
Source: PubMed Central journal article supplement (PMC5261010; doi:10.1038/cddis.2016.411), 2016-12-08
Supplement: cddis2016411x5.pdf [file cddis2016411x5.pdf]

**Supplementary table 1.** List of antibodies used in this study

| Antibody | Fluorophore | Company        | Catalog number |
|----------|-------------|----------------|----------------|
| AnexinaV | PE          | BD Pharmingen  | 556422         |
| B220     | FITC        | Immunostep     | M45RF-05MG     |
| B220     | PE          | BD Pharmingen  | 553089         |
| CD11b    | FITC        | Immunostep     | M11BF-05MG     |
| CD11b    | PE          | Immunostep     | M11BPE-02MG    |
| CD11c    | FITC        | Immunostep     | M11CF-05MG     |
| CD127    | BV510       | BD Biosciences | 563353         |
| CD16/32  | V450        | BD Biosciences | 560539         |
| CD25     | PE-Cy7      | BD Biosciences | 552880         |
| CD3      | FITC        | eBioscience    | 11-0031-82     |
| CD3      | PerCP Cy5   | BD Pharmingen  | 551163         |
| CD34     | APC         | eBioscience    | 50-0341-82     |
| CD4      | FITC        | Immunostep     | M4F-05MG       |
| CD4      | APC         | BD Biosciences | 553051         |
| CD44     | BV421       | BD Biosciences | 563970         |
| CD45     | APC         | BD Biosciences | 559864         |
| CD71     | PE          | BD Biosciences | 553267         |
| CD8      | FITC        | BD Biosciences | 553031         |
| CD8      | PE          | Immunostep     | M8APE-02MG     |
| c-Kit    | PerCP Cy5   | BioLegend      | 105824         |
| FLT3     | PE          | Immunostep     | 1399990072     |
| GR1      | FITC        | Immunostep     | MLY6G6CF-05MG  |
| IgM      | APC         | BD Biosciences | 550676         |
| IL7R     | FITC        | eBioscience    | 11-5898-81     |
| Sca1     | PE Cy7      | BD Biosciences | 558162         |
| Ter119   | FITC        | Immunostep     | MECF-05MG      |
